# Supplementary material for: Palm oil consumption and its repercussion on endogenous fatty acids distribution
Source: Royal Society of Chemistry journal article supplement (doi:10.1039/d0fo02511a), 2021-01-01
Supplement: d0fo02511a1.pdf [file d0fo02511a1.pdf]

**Supplement table 1.** validation using 7-fold cross-validation

| Group | Tissues         | R <sup>2</sup> X | R <sup>2</sup> Y | Q <sup>2</sup> Y | R <sup>2</sup> -intercept | Q <sup>2</sup> -intercept |
|-------|-----------------|------------------|------------------|------------------|---------------------------|---------------------------|
| POG   | Liver           | 0.978            | 0.485            | 0.454            | 0.020                     | -0.662                    |
|       | Perienteric Fat | 1.000            | 0.999            | 0.992            | 0.440                     | -3.220                    |
|       | Epididymal Fat  | 1.000            | 0.999            | 0.944            | 0.554                     | -3.430                    |
|       | Perirenal Fat   | 0.992            | 0.658            | 0.602            | 0.119                     | -0.818                    |
